**Erratum****A Raf/MEK/ERK signaling pathway is required for development of the sea urchin embryo micromere lineage through phosphorylation of the transcription factor Ets**

Eric Röttinger, Lydia Besnardeau and Thierry Lepage *Development* **131**, 1075-1087.

The address of the authors was missing from this article

The authors are based at UMR 7009 CNRS, Université de Paris VI, Observatoire Océanologique, 06230 Villefranche-sur-Mer, France

We apologise to the authors and readers for this mistake.
